# Supplementary material
Source: publisher figshare collection journal article supplement (https://tandf.figshare.com/ndownloader/files/13610687)
Supplement: Supplementary file 1 [file 13610687]

Supplementary file nestedness

Equations 1-4

(1)

J= H/ln(S)

**(**2)

R=(S-1)/ln N (3)

(4)

Where

n- Importance value for each species

N-Total importance values

S- Total number of species in the community


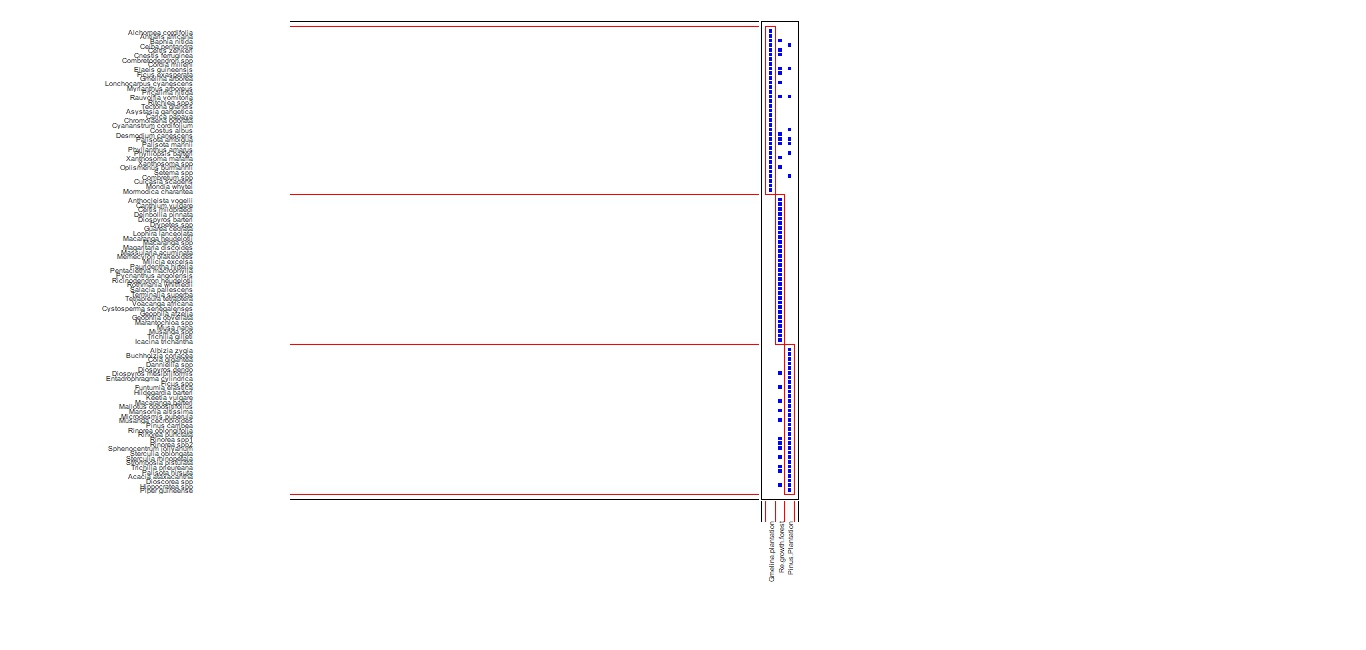


Modules Images
